# Supplementary material for: Cocatalyst effects in Hf-catalysed olefin polymerization: taking well-defined Al–alkyl borate salts into account
Source: Royal Society of Chemistry journal article supplement (doi:10.1039/d3dt04081j), 2024-01-01
Supplement: d3dt04081j1.pdf [file d3dt04081j1.pdf]

## Supporting Information

# Cocatalyst effect in Hf-catalysed olefin polymerization: taking well-defined Al-alkyl borate salts into account

Gaia Urciuoli,<sup>a,b,c</sup> Francesco Zaccaria,<sup>a,c,\*</sup> Cristiano Zuccaccia,<sup>b,c,\*</sup> Roberta Cipullo,<sup>a,c,\*</sup> Peter H. M. Budzelaar,<sup>a</sup> Antonio Vittoria,<sup>a</sup> Christian Ehm,<sup>a,c</sup> Alceo Macchioni,<sup>b,c</sup> Vincenzo Busico<sup>a,c</sup>

a) Dipartimento di Scienze Chimiche, Università di Napoli Federico II, 80126 Napoli, Italy.

b) Dipartimento di Chimica, Biologia e Biotecnologie and CIRCC, Università di Perugia, 06123 Perugia, Italy.

c) DPI, P.O. Box 902, 5600 AX Eindhoven, the Netherlands.

## Table of content

|                                                                          |   |
|--------------------------------------------------------------------------|---|
| <b>Detailed polymerization procedure</b> .....                           | 2 |
| <b>Table S1.</b> Full polymerization results .....                       | 4 |
| <b>Figure S1.</b> Representative monomer uptake vs. time profiles .....  | 6 |
| <b>Figure S2.</b> Representative GPC traces .....                        | 7 |
| <b>Figure S3.</b> Representative <sup>13</sup> C NMR spectra of PP ..... | 8 |

## Detailed polymerization procedure

Prior to the execution of a polymerization library, the PPR48 modules undergo 'bake-and-purge' cycles overnight (8 h at 90-140°C with intermittent dry N<sub>2</sub> flow), to remove any contaminants and left-overs from previous experiments. After cooling to glovebox temperature, the module stir tops are taken off, and the 48 cells are fitted with disposable 10 mL glass inserts (pre-weighed in a Mettler-Toledo Bohdan Balance Automator) and polyether ether ketone (PEEK) stir paddles. The stir tops are then set back in place, and N<sub>2</sub> in the reactors is replaced with ethene (ambient pressure).

The cells are then loaded with the appropriate amounts of toluene, containing TIBA, MAO or MAO/BHT as a scavenger where appropriate (see Table 1). The system is then thermostated at the reaction temperature and pressurized with 2 bar (30 psi) partial pressure of propene. At this point, the catalyst injection sequence is started; aliquots of (a) a toluene 'chaser', (b) a toluene solution of catalyst, (c) a toluene solution of the proper activator, and (d) a toluene 'buffer', all separated by nitrogen gaps, are uploaded into the needle and subsequently injected into the cell of destination in reverse order, thus starting the reaction. This is left to proceed under stirring (800 rpm) at constant temperature and pressure with feed of propene on demand until the desired monomer consumption has been reached, and quenched by over-pressurizing the cell with 3.4 bar (50 psi) of dry air (preferred over other possible catalyst quenchers because in case of cell or quench line leakage oxygen is promptly detected by the dedicated glove-box sensor).

Once all cells have been quenched, the modules are cooled down to glovebox temperature and vented, the stir-tops are removed, and the glass inserts containing the reaction phases are taken out and transferred to a centrifugal evaporator (Genevac EZ-2 Plus or Martin Christ RVC 2-33 CDplus), where all volatiles are removed, and the polymers are thoroughly dried overnight. Reaction yields are double-checked against on-line monomer conversion measurements by robotically weighing the dry polymers while still in the reaction vials, subtracting the pre-recorded tare. Polymer aliquots are then sent to characterization.

All polymers were characterized by means of high-temperature gel permeation chromatography (GPC) and <sup>13</sup>C NMR spectroscopy. GPC curves were recorded with a Freeslate Rapid GPC setup, equipped with a set of two mixed-bed Agilent PLgel 10 μm columns and a Polymer Char IR4 detector. Calibration was performed with the universal method, using 10 monodisperse polystyrene samples (*M<sub>n</sub>* between 1.3 and 3,700 kDa). Quantitative <sup>13</sup>C NMR spectra were recorded by using a Bruker Avance III 400 spectrometer equipped with a high-temperature cryoprobe for 5-mm OD tubes, on 45-mg mL<sup>-1</sup> polymer solutions in tetrachloroethane-*d*<sub>2</sub> (with

BHT added as a stabilizer, [BHT] = 0.4 mg mL<sup>-1</sup>). Acquisition conditions were: 45° pulse; acquisition time, 2.7 s; relaxation delay, 5.0 s; 2 K transients. Broadband proton decoupling was achieved with a modified WALTZ16 sequence (BI\_WALTZ16\_32 by Bruker).

**Table S1.** Full polymerization results.<sup>[a]</sup>

| Entry | Catalyst                 | [Hf]<br>(10 <sup>-6</sup> M) | Cocatalyst   | [Al]/[Hf] | t <sub>p</sub><br>(s) | Yield<br>(mg) | R <sub>p</sub> ,<br>(kg <sub>PP</sub> ·mmol <sub>Cat</sub> <sup>-1</sup> ·h <sup>-1</sup> ) | M <sub>n</sub> <sup>[b]</sup><br>(kDa) | M <sub>w</sub> <sup>[b]</sup><br>(kDa) | PDI | σ <sup>[c]</sup> |
|-------|--------------------------|------------------------------|--------------|-----------|-----------------------|---------------|---------------------------------------------------------------------------------------------|----------------------------------------|----------------------------------------|-----|------------------|
| 1     | <b>C<sub>S</sub>-Met</b> | 20                           | MAO          | 500       | 7201                  | 26.1          | 0.13                                                                                        | 50                                     | 107                                    | 2.2 | 0.96             |
| 2     | <b>C<sub>S</sub>-Met</b> | 20                           | MAO          | 500       | 7200                  | 21.5          | 0.11                                                                                        | 59                                     | 113                                    | 1.9 | 0.96             |
| 3     | <b>C<sub>S</sub>-Met</b> | 20                           | MAO          | 500       | 3943                  | 10.4          | 0.09                                                                                        | 53                                     | 109                                    | 2.1 | 0.96             |
| 4     | <b>C<sub>S</sub>-Met</b> | 20                           | MAO/BHT      | 500       | 2990                  | 132.9         | 1.6                                                                                         | 410                                    | 914                                    | 2.2 | 0.95             |
| 5     | <b>C<sub>S</sub>-Met</b> | 20                           | MAO/BHT      | 500       | 3735                  | 134.9         | 1.3                                                                                         | 392                                    | 856                                    | 2.2 | 0.95             |
| 6     | <b>C<sub>S</sub>-Met</b> | 20                           | MAO/BHT      | 500       | 4556                  | 139.2         | 1.1                                                                                         | 395                                    | 862                                    | 2.2 | 0.95             |
| 7     | <b>C<sub>S</sub>-Met</b> | 20                           | TTB/TIBAL    | 50        | 1660                  | 92.2          | 2.0                                                                                         | 422                                    | 970                                    | 2.3 | 0.96             |
| 8     | <b>C<sub>S</sub>-Met</b> | 20                           | TTB/TIBAL    | 50        | 1926                  | 74.9          | 1.4                                                                                         | 410                                    | 970                                    | 2.4 | 0.96             |
| 9     | <b>C<sub>S</sub>-Met</b> | 20                           | TTB/TIBAL    | 50        | 2893                  | 112.5         | 1.4                                                                                         | 400                                    | 971                                    | 2.4 | 0.96             |
| 10    | <b>C<sub>S</sub>-Met</b> | 20                           | <b>AIHAI</b> | 10        | 627                   | 121.4         | 7.0                                                                                         | 372                                    | 814                                    | 2.2 | 0.95             |
| 11    | <b>C<sub>S</sub>-Met</b> | 20                           | <b>AIHAI</b> | 10        | 1187                  | 165.1         | 5.0                                                                                         | 290                                    | 721                                    | 2.5 | 0.95             |
| 12    | <b>C<sub>S</sub>-Met</b> | 20                           | <b>AIHAI</b> | 10        | 754                   | 96.8          | 4.6                                                                                         | 354                                    | 743                                    | 2.1 | 0.95             |
| 13    | <b>C<sub>2</sub>-Met</b> | 30                           | MAO          | 333       | 7123                  | 20.5          | 0.06                                                                                        | 90                                     | 279                                    | 3.1 | 0.999            |
| 14    | <b>C<sub>2</sub>-Met</b> | 30                           | MAO          | 333       | 10048                 | 13.4          | 0.03                                                                                        | 100                                    | 314                                    | 3.2 | 0.998            |
| 15    | <b>C<sub>2</sub>-Met</b> | 30                           | MAO          | 333       | 7202                  | 12.0          | 0.03                                                                                        | 83                                     | 213                                    | 2.6 | 0.999            |
| 16    | <b>C<sub>2</sub>-Met</b> | 30                           | MAO/BHT      | 333       | 3601                  | 19.1          | 0.13                                                                                        | 129                                    | 413                                    | 3.2 | 0.998            |
| 17    | <b>C<sub>2</sub>-Met</b> | 30                           | MAO/BHT      | 333       | 7202                  | 46.3          | 0.15                                                                                        | 140                                    | 406                                    | 2.9 | 0.997            |
| 18    | <b>C<sub>2</sub>-Met</b> | 30                           | MAO/BHT      | 333       | 2925                  | 10.9          | 0.10                                                                                        | 138                                    | 373                                    | 2.7 | 0.997            |
| 19    | <b>C<sub>2</sub>-Met</b> | 12                           | TTB/TIBAL    | 100       | 1470                  | 92.7          | 3.8                                                                                         | 79                                     | 178                                    | 2.2 | 0.995            |
| 20    | <b>C<sub>2</sub>-Met</b> | 12                           | TTB/TIBAL    | 100       | 1602                  | 67.3          | 2.5                                                                                         | 73                                     | 170                                    | 2.3 | 0.995            |
| 21    | <b>C<sub>2</sub>-Met</b> | 12                           | TTB/TIBAL    | 100       | 1237                  | 72.9          | 3.5                                                                                         | 68                                     | 155                                    | 2.3 | 0.995            |
| 22    | <b>C<sub>2</sub>-Met</b> | 12                           | <b>AIHAI</b> | 20        | 1630                  | 75.2          | 2.8                                                                                         | 61                                     | 140                                    | 2.3 | 0.993            |
| 23    | <b>C<sub>2</sub>-Met</b> | 12                           | <b>AIHAI</b> | 20        | 1405                  | 82            | 3.5                                                                                         | 51                                     | 113                                    | 2.2 | 0.993            |
| 24    | <b>C<sub>2</sub>-Met</b> | 12                           | <b>AIHAI</b> | 20        | 1336                  | 80.8          | 3.6                                                                                         | 44                                     | 98                                     | 2.2 | 0.993            |

|    |             |    |              |      |      |       |     |     |      |     |       |
|----|-------------|----|--------------|------|------|-------|-----|-----|------|-----|-------|
| 25 | <b>OOOO</b> | 10 | MAO          | 1000 | 2461 | 96.9  | 2.8 | 5   | 17   | 3.5 | 0.87  |
| 26 | <b>OOOO</b> | 10 | MAO          | 1000 | 1706 | 83.9  | 3.5 | 5   | 23   | 4.2 | 0.87  |
| 27 | <b>OOOO</b> | 10 | MAO          | 1000 | 1550 | 95.6  | 4.4 | 7   | 25   | 3.8 | 0.87  |
| 28 | <b>OOOO</b> | 10 | MAO/BHT      | 1000 | 1244 | 135.2 | 7.8 | 309 | 725  | 2.3 | 0.87  |
| 29 | <b>OOOO</b> | 10 | MAO/BHT      | 1000 | 924  | 104.5 | 8.1 | 258 | 579  | 2.2 | 0.87  |
| 30 | <b>OOOO</b> | 10 | MAO/BHT      | 1000 | 978  | 125.2 | 9.2 | 331 | 802  | 2.4 | 0.87  |
| 31 | <b>OOOO</b> | 10 | TTB/TIBAL    | 100  | 1542 | 76.1  | 3.6 | 31  | 64   | 2.1 | 0.89  |
| 32 | <b>OOOO</b> | 10 | TTB/TIBAL    | 100  | 1556 | 79.3  | 3.7 | 33  | 72   | 2.2 | 0.89  |
| 33 | <b>OOOO</b> | 10 | TTB/TIBAL    | 100  | 824  | 54.5  | 4.8 | 29  | 64   | 2.2 | 0.89  |
| 34 | <b>OOOO</b> | 10 | <b>AIHAI</b> | 20   | 2040 | 79    | 2.8 | 52  | 117  | 2.2 | 0.88  |
| 35 | <b>OOOO</b> | 10 | <b>AIHAI</b> | 20   | 1787 | 75.5  | 3.0 | 49  | 107  | 2.2 | 0.88  |
| 36 | <b>OOOO</b> | 10 | <b>AIHAI</b> | 20   | 1627 | 76.7  | 3.4 | 65  | 150  | 2.3 | 0.88  |
| 37 | <b>PyAm</b> | 4  | MAO          | 750  | 4002 | 64    | 2.9 | 14  | 86   | 6.1 | 0.994 |
| 38 | <b>PyAm</b> | 4  | MAO          | 750  | 3513 | 69.3  | 3.6 | 13  | 80   | 6.4 | 0.994 |
| 39 | <b>PyAm</b> | 4  | MAO          | 750  | 2745 | 86.7  | 5.7 | 6   | 33   | 5.7 | 0.995 |
| 40 | <b>PyAm</b> | 4  | MAO/BHT      | 750  | 862  | 95.7  | 20  | 732 | 1930 | 2.6 | 0.994 |
| 41 | <b>PyAm</b> | 4  | MAO/BHT      | 750  | 981  | 113.6 | 21  | 812 | 1829 | 2.3 | 0.994 |
| 42 | <b>PyAm</b> | 4  | MAO/BHT      | 750  | 371  | 81.6  | 40  | 860 | 2073 | 2.4 | 0.994 |
| 43 | <b>PyAm</b> | 4  | MAO/BHT      | 2250 | 805  | 65.5  | 15  | 442 | 1098 | 2.5 | 0.994 |
| 44 | <b>PyAm</b> | 4  | MAO/BHT      | 2250 | 800  | 99.6  | 22  | 931 | 1925 | 2.1 | 0.994 |
| 45 | <b>PyAm</b> | 4  | MAO/BHT      | 2250 | 573  | 110.9 | 35  | 662 | 1734 | 2.6 | 0.994 |
| 46 | <b>PyAm</b> | 4  | TTB/TIBAL    | 250  | 528  | 71.9  | 24  | 62  | 203  | 3.3 | 0.994 |
| 47 | <b>PyAm</b> | 4  | TTB/TIBAL    | 250  | 677  | 87.4  | 23  | 60  | 172  | 2.8 | 0.994 |
| 48 | <b>PyAm</b> | 4  | TTB/TIBAL    | 250  | 564  | 75.7  | 24  | 57  | 152  | 2.7 | 0.994 |
| 49 | <b>PyAm</b> | 4  | <b>AIHAI</b> | 50   | 2811 | 69.7  | 4.5 | 310 | 929  | 3.0 | 0.995 |
| 50 | <b>PyAm</b> | 4  | <b>AIHAI</b> | 50   | 2459 | 76.8  | 5.6 | 221 | 760  | 3.4 | 0.995 |
| 51 | <b>PyAm</b> | 4  | <b>AIHAI</b> | 50   | 1888 | 81.4  | 7.8 | 358 | 1151 | 3.2 | 0.995 |

<sup>[a]</sup> in toluene (5 mL), 60 °C,  $p_{\text{propene}} = 2$  bar (30 psi); [Al] = 10 mM for MAO and MAO/BHT, 1 mM for TIBAL or 0.1 mM for **AIHAI**; [B]/[Hf] = 5 for dichloride precatalysts **Hf-C<sub>s</sub>-Met** and **Hf-C<sub>2</sub>-Met**,<sup>[31,42]</sup> 1 for **Hf-OOOO**<sup>[34]</sup> or 2 for **Hf-PyAm**,<sup>[60,61]</sup> according to previously optimized procedures. <sup>[b]</sup> As determined by GPC. <sup>[c]</sup> Probability of inserting propene with the favoured enantioface at each of the two enantiotopic sites.

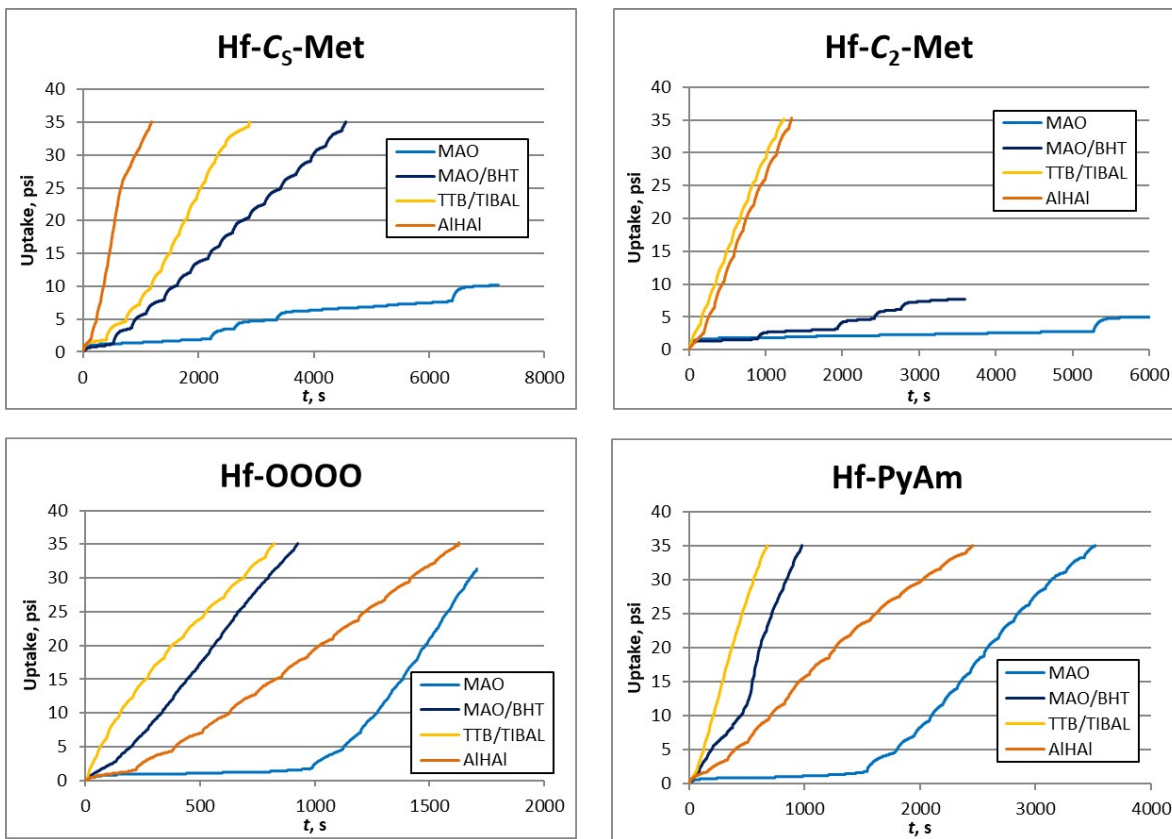

**Figure S1.** Representative monomer uptake vs. time profiles obtained with the four catalysts studied.

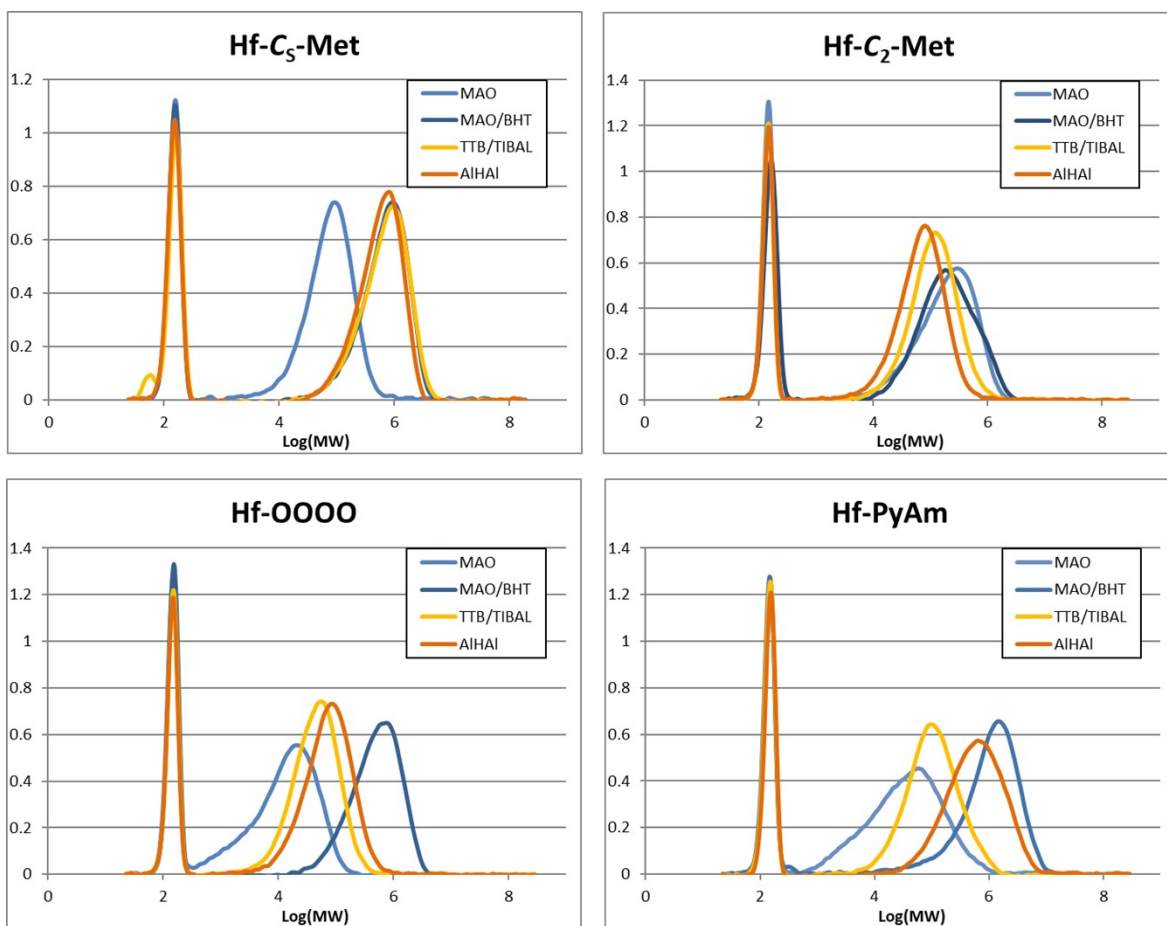

**Figure S2.** Representative GPC traces of polymers obtained with the four catalysts studied. The sharp peak at  $\log(\text{MW}) \sim 2$  is due to the stabilizer.

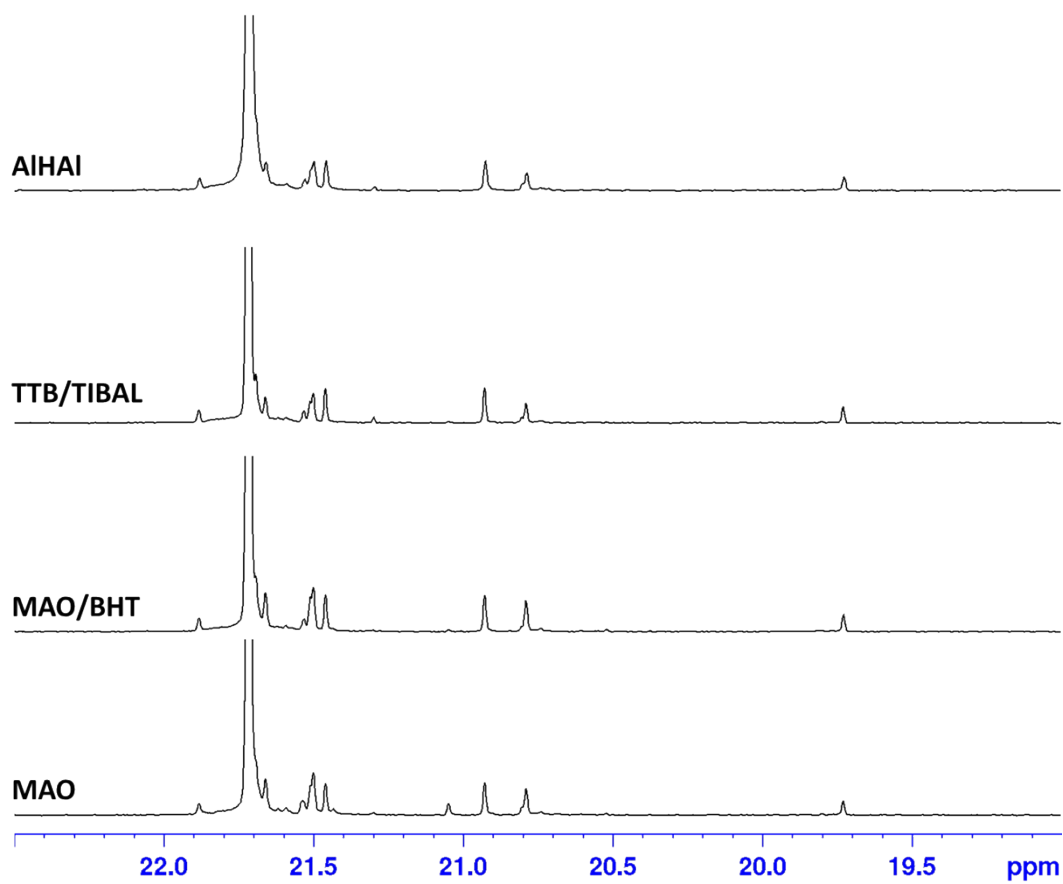

**Figure S3.** Representative  $^{13}\text{C}$  NMR spectra (tetrachloroethane- $d_2$ , 393 K; methyl region) of PP obtained with Hf-PyAm.
